# Supplementary material for: The Influence of Working from Home vs. Working at the Office on Job Performance in a Hybrid Work Arrangement: A Diary Study
Source: Springer Nature journal article supplement (doi:10.1007/s10869-024-09970-7), 2024-07-13
Supplement: MOESM1 [file 10869_2024_9970_MOESM1_ESM.docx]

**ONLINE SUPPLEMENTAL MATERIALS**

| *Direct effects* | *Parameter estimates obtained with the 3-item measure of work engagement* | *Parameter estimates obtained with the 2-item measure of work engagement* |
| --- | --- | --- |
| WFH (vs. WATO) – Daily social isolation | *.29**** | *.29**** |
| Daily social isolation - daily tension | *.14**** | *.14**** |
| Daily tension - daily job performance | *-.01* | *-.01* |
| WFH (vs. WATO) - daily job concentration | *.21**** | *.21**** |
| Daily job concentration - daily work engagement | *.38**** | *.35**** |
| Daily work engagement - daily job performance | *.34**** | *.27**** |
| WFH (vs. WATO) - daily tension | *-.39**** | *-.39**** |
| WFH (vs. WATO) - daily work engagement | *.11**** | *.18**** |
| *Hypothesized indirect effects* |  |  |
| WFH (vs. WATO) - daily job concentration - daily work engagement - daily job performance | *.03**** | *.02**** |
| WFH (vs. WATO) - daily social isolation - daily tension - daily job performance | *.00* | *.00* |
| WFH (vs. WATO) - daily job concentration - tension - daily job performance | *.00* | *.00* |
| WFH (vs. WATO) - daily social isolation - daily work engagement - daily job performance | *-.01*** | *-.01*** |
| *Other indirect effects* |  |  |
| WFH (vs. WATO) - daily work engagement - daily job performance | *.04*** | *.05*** |
| WFH (vs. WATO) - daily tension - daily job performance | *.00* | *.00* |

**Table S1. Comparison of the unstandardized parameter estimates obtained when using the UWES-3 (Schaufeli et al., 2019) and a 2-item version of this scale.**

*Note*. The 3-item scale we used to measure work engagement (Schaufeli et al., 2019) is composed of the following items: “During my work, I felt bursting with energy”, “I felt enthusiastic about my job”, and “I felt immersed in my job”. The 2-item version is composed of the first two items. WFH (vs. WATO): Working from home (vs. working at the office). Coding: 0. WATO; 1. WFH. ** *p* < .01; *** *p* < .001.
